# Supplementary material for: Halting angiogenesis by non-viral somatic gene therapy alleviates psoriasis and murine psoriasiform skin lesions
Source: JCI journal article supplement (doi:10.1172/jci41295), 2010-12-06

## **Supplemental Figure 1: Structure of ADAM-15 and experimental plasmids.**

**a)** Domain structure of ADAM-15 (metargidin) and sequence alignment of RDD with the disintegrin domains of human and murine ADAM-15. \* indicates amino acids shared in all three sequences.

**b)** Map with restriction sites of the *pVAX1* vector with inserted RDD or RDD-RFP, respectively. The *pVAX* vector contains 2999 bp (CMV promoter: bases 137-724; T7 promoter/priming site: 664-683; multiple cloning site: 696-811; BGH reverse priming site: 823-840; BGH polyadenylation signal: 829-1053; kanamycin resistance gene: 1226-2020; pUC origin: 2320-2993).

**Supplemental Figure 2: Recombinant RDD inhibits endothelial functions *in vitro*.**

**a)** Monolayer cultures of CPAE endothelial cells were scratched in a standardized fashion, resulting in a cell-free lane in each culture. Cultures were then kept in normal medium or exposed to the indicated concentrations of purified RDD, and migration of endothelial cells into the cell-free area was monitored for up to 15h. The margins of the cell layers are indicated by black lines.

**b)** Quantitative analysis of CPAE cultures described in *a)* shows dose-dependent delays of the closure of the cell-free areas. Each bar represents the mean of 16 to 21 individual cultures for each condition ( $\pm$ SD). \*\*\* indicates  $p < 0.001$  compared to the untreated control.

**Supplemental Figure 3: Standardized measurement of the cutaneous blood flow.**

**a)** Anaesthetized mice are placed gently on a temperature-regulated platform (adjusted to 37°C, indicated by \*), and the RMV™ 708 Scanhead (\*\*) is positioned precisely through its 3D motorization (\*\*\*).

**b)** Four areas in each mouse were measured in a standardized fashion as indicated. The large femoral vessels and abdominal mamillae were used as reliable orientation structures to measure the exact same regions at each time point.

**c)** The blood flow in three-dimensional areas of the upper dermal plexus were measured as exemplified and are expressed as percentages of the entire volumes.

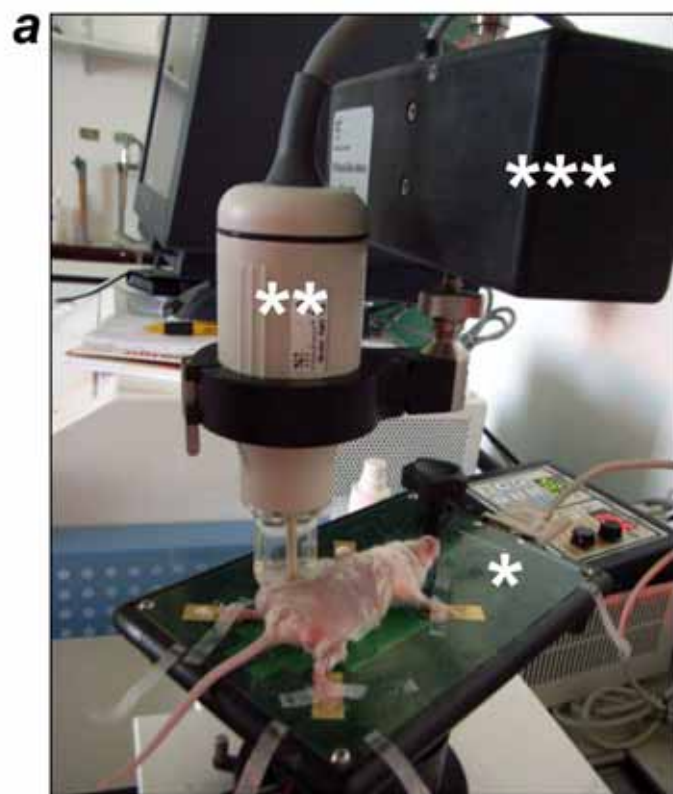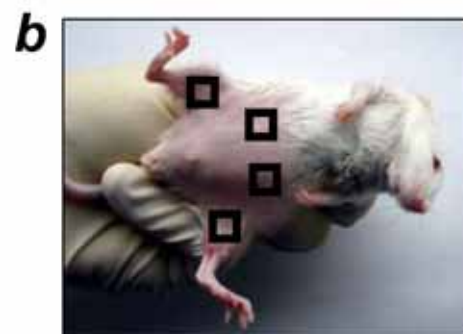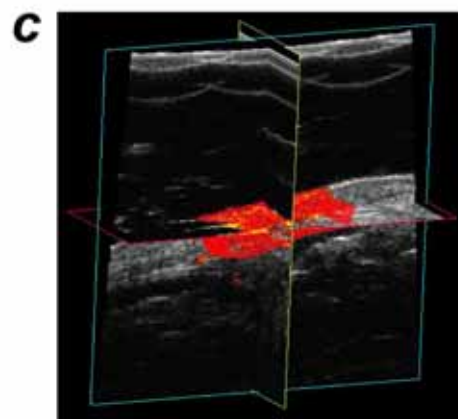

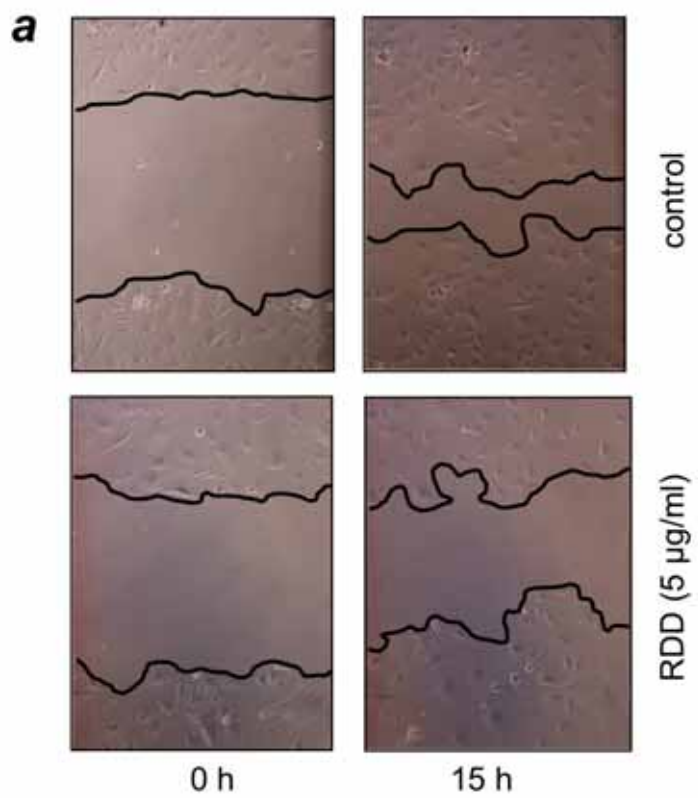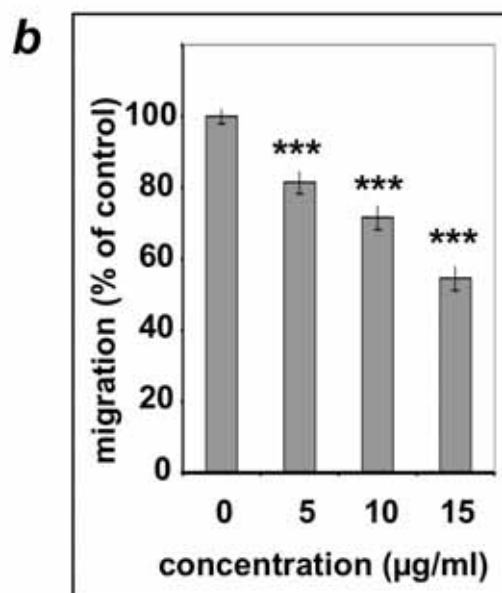

**a**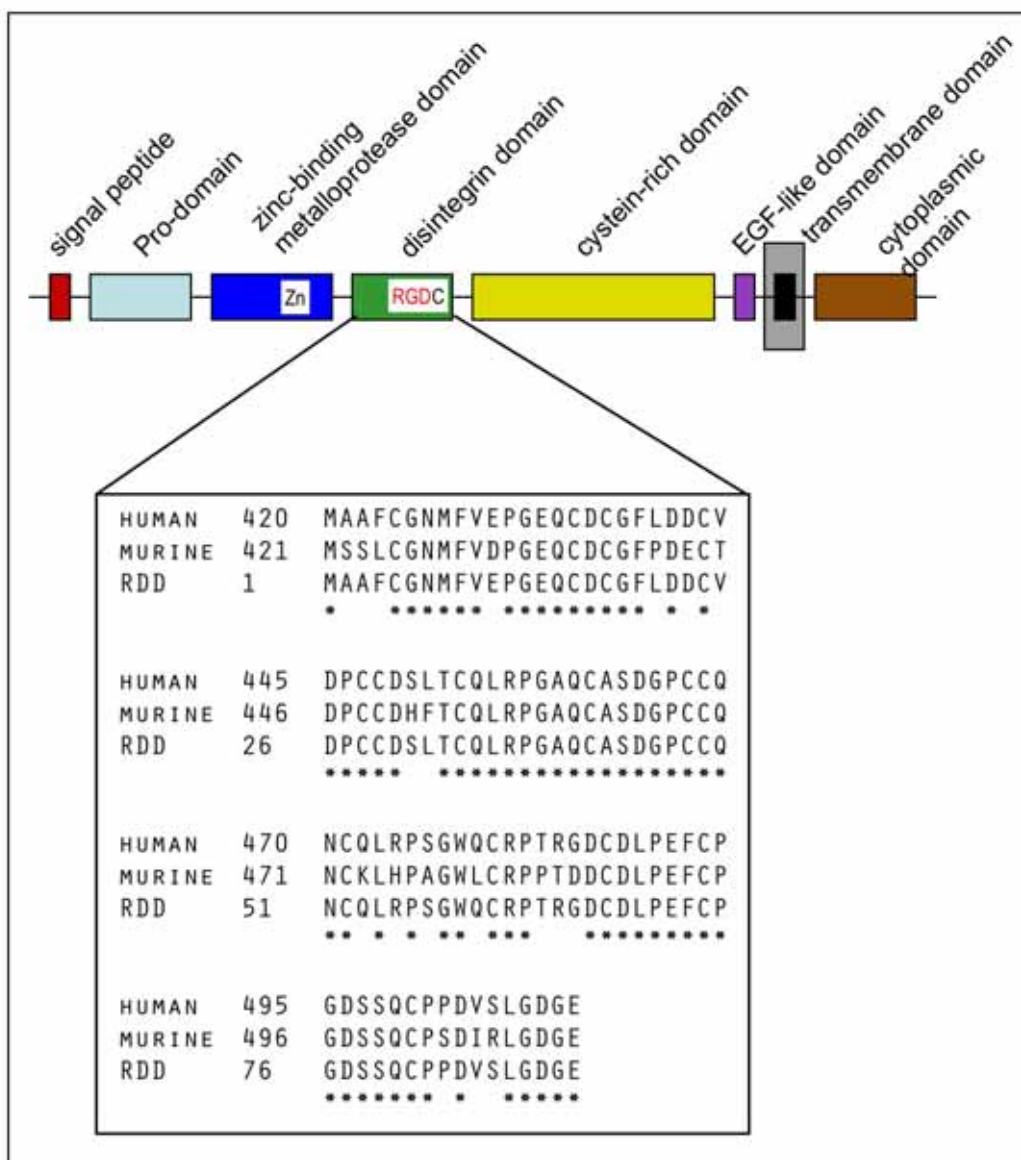**b**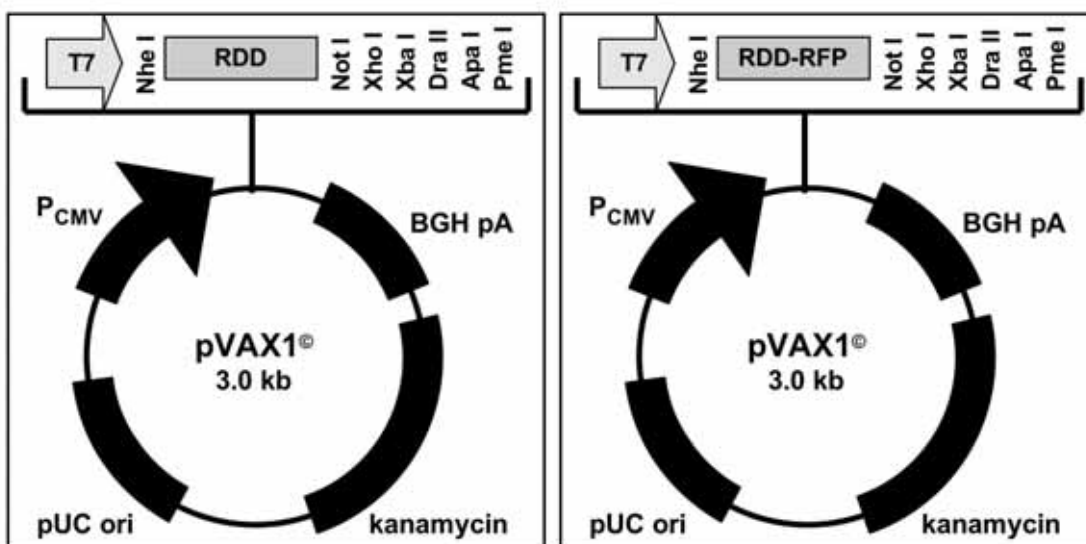

Supplement: sd1 [file 1]
